# Supplementary material
Source: PubMed Central journal article supplement (PMC2660745)
Supplement: 0807187106_0807187106SI.pdf [file 0807187106_0807187106SI.pdf]

# Supporting Information

Brede et al. 10.1073/pnas.0807187106

## SI Text

**Statistical Analysis: Factorial Correspondence Analysis (Fig. 3).** We used a correspondence analysis (CA; also called reciprocal averaging), which is based on a unimodal model. Factorial correspondence analysis (FCA) is adapted for use with diploid genetic data following She et al. (1) and is implemented in GENETIX (2). FCA is an exploratory technique, suitable for categorical data, which allows investigation of correspondence between rows (e.g., individuals) and columns (e.g., alleles) in a two-way table. It enables visualization of individuals in multidimensional space, with no a priori assumptions about grouping, using each allele as an independent variable. Axes are generated from combinations of alleles that explain portions of the total observed “inertia” of the table. Hence, those alleles exhibiting the strongest nonrandom association with groups of individuals will contribute most to the axes. We have analyzed the global variability of the whole collection of *Daphnia* individuals (per lake) and projected the “centers of gravity” for each sample (sample = all individuals of a particular time period). CA axis 1 has been used as an indicator of the genetic changes and associated with P concentration on the y axis.

**Statistical Analysis: Hardy-Weinberg Equilibrium (Table S1 and Fig. S1).** We tested the hypothesis that the relative abundance of interspecific hybrids is determined by the relative abundance of

parental species. This test is based on the assumption that both species (*D. hyalina* and *D. galeata*) mate randomly in each lake during each time period. All available genetic information (microsatellites and ITS RFLP patterns) were used to group all individuals into 3 hybrid categories (*D. hyalina* and *D. galeata* or hybrid). If both *Daphnia* species (alternative homozygotes) mate randomly (e.g., no mating preferences, no selection), the frequency of interspecific hybrids (heterozygotes) should be proportional to the relative frequency of parental species according to the Hardy-Weinberg equilibrium (HWE). In the majority of cases (67%), Hardy-Weinberg assumptions were not violated, suggesting that in most time periods, mating of parental taxa was random without any prevalent pre- or postzygotic barrier. However, deviations from the HWE (e.g., in Greifensee) suggest that either selection or assortative mating caused a higher abundance of interspecific hybrids than expected from random mating. The slope of regression was significantly higher than 1 ( $P < 0.0001$ ) in Greifensee but not different from 1 in Lake Constance ( $P > 0.15$ ). In summary, although the assumptions of the HWE are not met in all cases, our data analysis does not reject the hypothesis that abundances of parental taxa are responsible for the occurrence and relative abundances of interspecific hybrids.

1. She JX, Autem M, Kotulas G, Pasteur N, Bonhomme F (1987) Multivariate analysis of genetic exchanges between *Solea aegyptiaca* and *Solea senegalensis* (Teleosts, Soleidae). *Biol J Linn Soc* 32:357–371.

2. Belkhir K, Borsa P, Chikhi L, Raufaste N, Bonhomme F (1996–2004) GENETIX 4.05, logiciel sous Windows TM pour la génétique des populations (Laboratoire Génome, Populations, Interactions, CNRS UMR 5000, Université de Montpellier II, Montpellier, France).

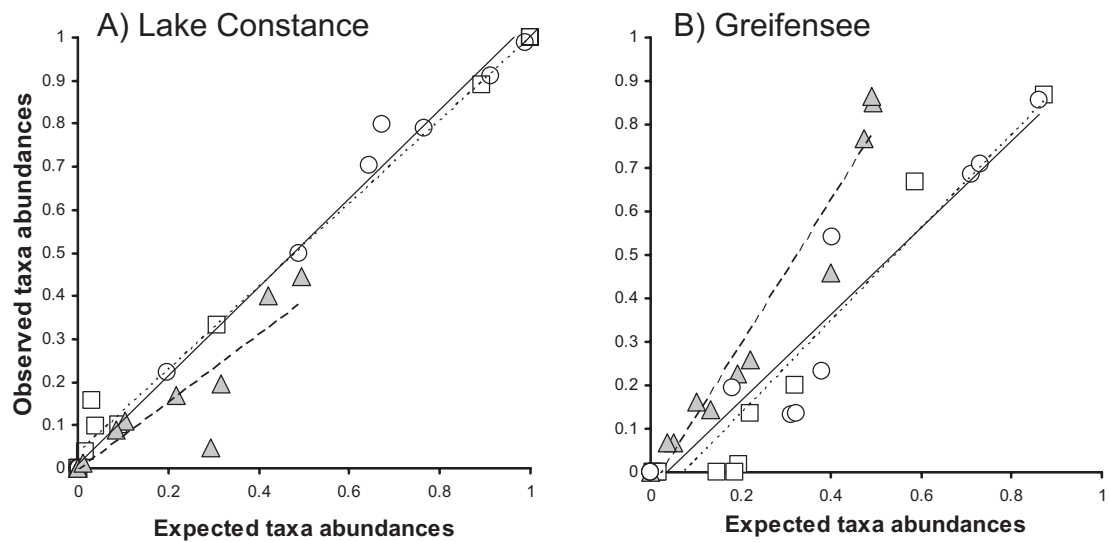

**Fig. S1.** Comparison of observed and expected parental and hybrid genotypes assuming the HWE in *Daphnia* populations of Lake Constance (A) and Greifensee (B). Observed species (*D. galeata* = circles, *D. hyalina* = squares) and hybrid (gray triangles) identification is based on nuclear DNA markers (ITS and microsatellites), and expected taxon abundances are calculated according to Hardy-Weinberg expectations (Table S1). Lines represent linear correlations of observed and expected taxa abundances (stippled = *D. galeata* × *hyalina*, dotted = *D. hyalina*, solid = *D. galeata*). (A) Regression line for interspecific hybrids in Lake Constance:  $-0.013 (\pm 0.056) + 0.81 (\pm 0.195) \times x$ . (B) Regression line for interspecific hybrids in Greifensee:  $-0.04 (\pm 0.038) + 1.66 (\pm 0.13) \times x$ .

**Table S1. Hardy-Weinberg expectations of *Daphnia* taxa**

| Lake           | Time      | $\chi^2$ | <i>P</i> |
|----------------|-----------|----------|----------|
| Lake Constance | 1945–1953 | 0.031    | 0.860    |
|                | 1954–1959 | 0.270    | 0.603    |
|                | 1960–1963 | 0.068    | 0.794    |
|                | 1965–1970 | 10.101   | 0.001    |
|                | 1971–1975 | 45.265   | <0.001   |
|                | 1980–1987 | 0.003    | 0.955    |
|                | 1990–1995 | 0.122    | 0.727    |
|                | 1999–2004 | 4.967    | 0.026    |
| Greifensee     | 1927–1936 | 0.050    | 0.823    |
|                | 1942–1945 | 0.082    | 0.775    |
|                | 1948–1950 | 0.919    | 0.338    |
|                | 1951–1954 | 33.199   | <0.001   |
|                | 1958–1963 | 0.502    | 0.479    |
|                | 1966–1970 | 1.823    | 0.177    |
|                | 1971–1974 | 0.166    | 0.684    |
|                | 1977–1980 | 2.323    | 0.127    |
|                | 1988–1992 | 38.122   | <0.001   |
|                | 1999–2004 | 21.748   | <0.001   |

We used the relative abundances of species, based on ITS and microsatellite DNA markers, to estimate expected taxa proportions under random mating in both lakes. We found 3 of 8 (Lake Constance) and 3 of 10 (Greifensee) deviations from Hardy-Weinberg expectations ( $\chi^2$  test).

**Table S2. Number of *Daphnia* resting eggs subjected to DNA analyses**

| Lake           | Time      | ITS | 16S | $\mu$ sat |
|----------------|-----------|-----|-----|-----------|
| Lake Constance | 1908–1926 | 2   | 0   | 2         |
|                | 1935–1939 | 3   | 0   | 1         |
|                | 1940–1944 | 1   | 0   | 0         |
|                | 1945–1953 | 9   | 0   | 0         |
|                | 1954–1959 | 27  | 27  | 27        |
|                | 1960–1963 | 30  | 0   | 38        |
|                | 1965–1970 | 71  | 0   | 0         |
|                | 1971–1975 | 64  | 37  | 38        |
|                | 1980–1987 | 81  | 0   | 0         |
|                | 1990–1995 | 56  | 57  | 56        |
|                | 1999–2004 | 100 | 0   | 0         |
|                | Total     | 444 | 121 | 156       |
| Greifensee     | 1927–1936 | 30  | 30  | 30        |
|                | 1937–1939 | 15  | 14  | 14        |
|                | 1942–1945 | 15  | 15  | 15        |
|                | 1948–1950 | 38  | 34  | 34        |
|                | 1951–1954 | 66  | 61  | 61        |
|                | 1958–1963 | 44  | 25  | 25        |
|                | 1966–1970 | 97  | 76  | 76        |
|                | 1971–1974 | 29  | 18  | 18        |
|                | 1977–1980 | 100 | 49  | 49        |
|                | 1988–1992 | 66  | 39  | 39        |
|                | 1999–2004 | 56  | 52  | 52        |
|                | Total     | 556 | 413 | 413       |

ITS, RFLP analysis of the internal ITS region; 16S, 16S rDNA mitochondrial DNA RFLP;  $\mu$ sat, microsatellite analysis of 6 (Lake Constance) and 8 (Greifensee) polymorphic loci.

**Table S3. Species-specific mitochondrial DNA markers in *Daphnia***

| Species             | Haplotype | <i>Rsa</i> I | <i>Dde</i> I | <i>Mnl</i> I   |
|---------------------|-----------|--------------|--------------|----------------|
| <i>D. cucullata</i> | <i>c1</i> | 560          | 290–180–100  | 250–230–100    |
|                     | <i>c3</i> | 560          | 450–100      | 250–260–100    |
| <i>D. galeata</i>   | <i>g1</i> | 510–50       | 290–180–100  | 250–210–100    |
| <i>D. hyalina</i>   | <i>h1</i> | 560          | 390–100–80   | 230–180–100–90 |
|                     | <i>x7</i> | 560          | 450–100      | 250–260–100    |

RFLP analysis of 16S rDNA fragments using restriction enzymes *Rsa* I, *Dde* I, and *Mnl* I. Haplotypes *c1*, *g1*, and *h1* were reported in previous studies; *x7* and *c3* exhibit identical RFLP patterns, but DNA sequencing of 12S rDNA revealed large sequence differences (11.1% sequence divergence). Each resting egg of *D. cucullata* and a subsample of *D. hyalina* resting eggs were subjected to PCR and sequencing of mtDNA. Haplotype *c3* was found in only 12 *D. cucullata* resting eggs during the time period of 1958–1963, indicating a short but unsuccessful invasion of Greifensee.
